# Supplementary material for: Magneto-structural correlations of a three-dimensional Mn based metal–organic framework
Source: Royal Society of Chemistry journal article supplement (doi:10.1039/b922750d), 2010-01-01
Supplement: b922750d.pdf [file b922750d.pdf]

## SUPPORTING INFORMATION:

### Magneto-structural correlations of a three-dimensional Mn based metal-organic framework

Muhammad Arif Nadeem,<sup>a</sup> Donald J. Craig,<sup>b</sup> Roland Bircher<sup>c</sup> and John A. Stride<sup>\*a,c</sup>

<sup>a</sup> School of Chemistry, University of New South Wales, Sydney, NSW 2052, Australia. Fax: +61 (02) 9385 6141; Tel: +61 (0)2 9385 4675; E-mail: j.stride@unsw.edu.au

<sup>b</sup> Analytical Centre, University of New South Wales, Sydney, NSW 2052, Australia.

<sup>c</sup> Bragg Institute, Australian Nuclear Science and Technology Organisation, PMB 1, Menai, NSW 2234, Australia.

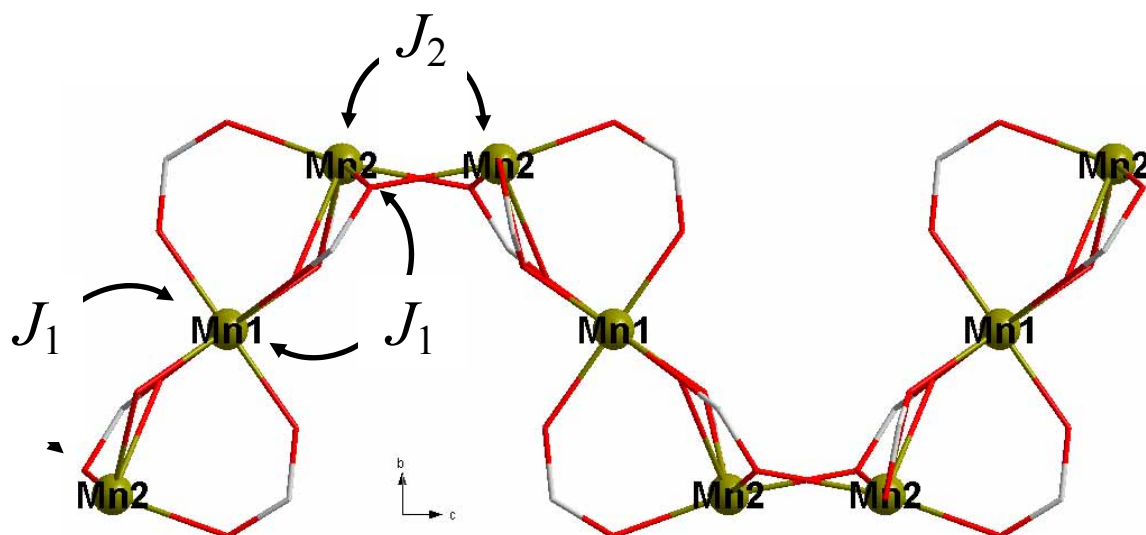

**Figure S1:** Schematic of the exchange interactions in  $[\text{Na}\{\text{Mn}_3(\text{Hbtc})_2(\text{btc})\}\cdot 5\text{H}_2\text{O}]_n$ : Models 1 and 2 use  $J_1 = J_2$ ; Model 3 has  $J_1 \neq J_2$ .
